# Supplementary material
Source: ML conference proceedings conference paper supplement (https://openaccess.thecvf.com/content/CVPR2026/html/Chen_Scaling_the_Long_CVPR_2026_paper.html)
Supplement: Supplementary file 1 [file Chen_Scaling_the_Long_CVPR_2026_supplemental.pdf]

# Scaling the Long Video Understanding of Multimodal Large Language Models via Visual Memory Mechanism

## Supplementary Material

### 7. Quantitative analysis

#### 7.1. Comparison with Non-LLaVA Models

Tab. 7 evaluates the performance gains from incorporating FlexMem with more non-LLaVA models. The consistent improvements further highlight the effectiveness of FlexMem.

Table 7. Comparison with two non-LLaVA base models.

| Method           | LLM       | LVBench     | LongVideoBench | MLVU        |
|------------------|-----------|-------------|----------------|-------------|
| Qwen2.5-VL       | 7B        | 45.3        | 56.0           | 70.2        |
| <b>+ FlexMem</b> | <b>7B</b> | <b>52.3</b> | <b>64.3</b>    | <b>75.0</b> |
| InternVL3.5      | 8B        | 43.8        | 62.0           | 70.6        |
| <b>+ FlexMem</b> | <b>8B</b> | <b>51.6</b> | <b>65.7</b>    | <b>71.9</b> |

#### 7.2. Impact of Layer Selection in MemIndex

Tab. 8 examines the effectiveness of our proposed optimization-based approach for the layer selection in MemIndex. Results show that optimization-based method achieves the best performance by identifying and selecting the most important cache layers for relevance computation.

Table 8. Ablation study on layer selection of memory indexing.

| Layer Selection                 | LVBench     | MLVU        |             |             |             |
|---------------------------------|-------------|-------------|-------------|-------------|-------------|
|                                 |             | Single      | Multi       | Holistic    | M-avg       |
| <b>Eq. 10-based<sup>‡</sup></b> | <b>45.7</b> | <b>77.1</b> | <b>53.1</b> | <b>77.5</b> | <b>72.1</b> |
| Last three layers               | 43.8        | 76.6        | 52.0        | 77.1        | 71.5        |
| Equal Interval (4,15,26)        | 45.0        | 76.8        | 52.5        | 77.3        | 71.7        |
